# Supplementary material for: Mesenchymal stem cells stabilize the blood–brain barrier through regulation of astrocytes
Source: PubMed Central journal article supplement (PMC4588687; doi:10.1186/s13287-015-0180-4), 2015-09-29
Supplement: 13287_2015_180_MOESM1_ESM.pdf [file 13287_2015_180_MOESM1_ESM.pdf]

## Additional file 1

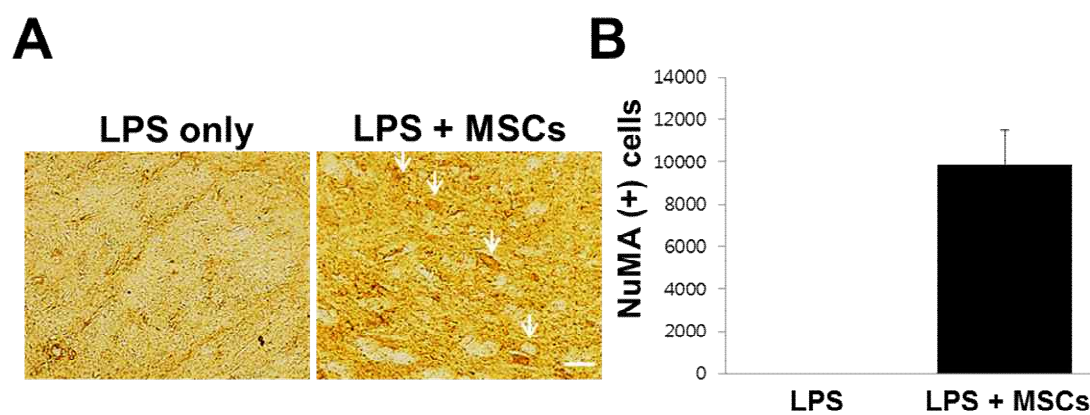

**Figure S1. Histological analysis of transplanted mesenchymal stem cells (MSCs) in LPS-injected rats.** The existence of MSCs in the left substantia nigra (SN) of LPS-injected rats was identified by immunohistochemistry using NuMA, a human specific marker (white arrow, A). The NuMA-positive cells were observed in animals treated with human MSCs, and the number of recruited MSCs is about 0.9% of the total transplanted MSCs (B,  $n = 3$ ).
